# Supplementary material
Source: Springer Nature journal article supplement (https://www.springermedizin.de/resource/supplementary/13075_2013_4002_MOESM1_ESM.pdf/9695894)
Supplement: MOESM1 [file 9695894]

# Extended Methods Form

Rice ASC, Cimino-Brown D, Eisenach JC, Kontinen VK, LaCroix-Fralish ML, Machin I, Mogil JS, Stöhr T. Animal models and the prediction of efficacy in clinical trials of analgesic drugs: a critical appraisal and call for uniform reporting standards. *Pain* 2008;139(2):243-7

## 1. Experimental design

|                               |                      |
|-------------------------------|----------------------|
| Experiments blinded           | <input type="text"/> |
| - what                        | <input type="text"/> |
| - how                         | <input type="text"/> |
| Randomization                 | <input type="text"/> |
| Power calculation             | <input type="text"/> |
| How many data points removed? | <input type="text"/> |
| - why                         | <input type="text"/> |

## 2. Animals

|                                |                      |
|--------------------------------|----------------------|
| Age                            | <input type="text"/> |
| Sex                            | <input type="text"/> |
| Genetic background of mutation | <input type="text"/> |
| Supplier                       | <input type="text"/> |
| Weight Range                   | <input type="text"/> |
| Behavioral Abnormalities       | <input type="text"/> |

Any additional comments

## 3. Environment

### a. Housing

|                                                           |                      |
|-----------------------------------------------------------|----------------------|
| Diet                                                      | <input type="text"/> |
| Bedding                                                   | <input type="text"/> |
| Cage rack ventilation                                     | <input type="text"/> |
| Home cage enrichment                                      | <input type="text"/> |
| Habituation time before experiments (in days)             | <input type="text"/> |
| Handling frequency before testing                         | <input type="text"/> |
| Cage cleaning frequency                                   | <input type="text"/> |
| # housed per cage                                         | <input type="text"/> |
| House experimental/ control groups together or separately | <input type="text"/> |
| Different species housed in same room                     | <input type="text"/> |
| Lights on time                                            | <input type="text"/> |
| Lights off time                                           | <input type="text"/> |
| Procedural anesthetic                                     | <input type="text"/> |
| Post-operative analgesia                                  | <input type="text"/> |
| -Analgesic and dose                                       | <input type="text"/> |

### b. Testing

|                                              |                      |
|----------------------------------------------|----------------------|
| # of testers                                 | <input type="text"/> |
| Experience of tester(s)                      | <input type="text"/> |
| Lighting intensity (lux)                     | <input type="text"/> |
| Time testing ends                            | <input type="text"/> |
| Test environment noise                       | <input type="text"/> |
| Recent calibration of testing equipment      | <input type="text"/> |
| Cleaning of test equip. between subjects     | <input type="text"/> |
| -with                                        | <input type="text"/> |
| Habituation time before testing (in minutes) | <input type="text"/> |
| Oestrus stage of females                     | <input type="text"/> |
| Number of animals present in testing room    | <input type="text"/> |
| Distance separated                           | <input type="text"/> |
| In visual contact                            | <input type="text"/> |
| Arousal state                                | <input type="text"/> |
